# Supplementary material for: Fresh Osteochondral Allograft Transplantation in Osteochondritis Dissecans in the Knee Joint
Source: MDPI journal article supplement (doi:10.3390/life11111205), 2021-11-08
Supplement: s1 [file s1]

**Table S2.** Clinical scores reported in the included studies of this review.

|                                                              |                  | Cotter et al.<br>2018                            | Sadr et al. 2016                                             | Lyon et al. 2012                    | Pasqual-Garrido<br>et al. 2009 | Emmerson et<br>al. 2007                             | Garrett et al.<br>1994 |
|--------------------------------------------------------------|------------------|--------------------------------------------------|--------------------------------------------------------------|-------------------------------------|--------------------------------|-----------------------------------------------------|------------------------|
| <b>18-point</b>                                              |                  | NA                                               | Pr: 13.6 ( $\pm$ 2.0)<br>F: 16.8 ( $\pm$ 1.5)<br>P: <.001*   | Pr: 12.7 (10–14)<br>F: 16.3 (10–18) | NA                             | Pr: 13.0 $\pm$ 1.7<br>F: 16.4 $\pm$ 2.0<br>P: <.01* | NA                     |
| <b>Tegner</b>                                                |                  | NA                                               | NA                                                           | NA                                  | Pr: 0<br>F: 6<br>P: <.001*     | NA                                                  | NA                     |
| <b>Lysholm</b>                                               |                  | NA                                               | NA                                                           | NA                                  | Pr: 25<br>F: 37<br>P: .015     | NA                                                  | NA                     |
| <b>IKDC total score</b>                                      |                  | Pr: 31<br>F: 59<br>P: <.001*                     | Pr: 44.2 ( $\pm$ 17.5)<br>F: 82.3 ( $\pm$ 15.8)<br>P: <.001* | NA                                  | Pr: 31<br>F: 45<br>P: 0.15     | NA                                                  | NA                     |
| <b>KS-F</b>                                                  |                  | NA                                               | Pr: 72.3 ( $\pm$ 18.6)<br>F: 95.7 ( $\pm$ 9.6)<br>P: <.001*  | NA                                  | NA                             | NA                                                  | NA                     |
| <b>KS-K</b>                                                  |                  | NA                                               | Pr: 81.1 ( $\pm$ 14.8)<br>F: 94.3 ( $\pm$ 8.8)<br>P: <.001*  | NA                                  | NA                             | NA                                                  | NA                     |
| <b>KOOS</b>                                                  | <b>Symptoms</b>  | Pr: $\approx$ 52<br>F: $\approx$ 69<br>P: <.001* | NA                                                           | NA                                  | Pr: 52<br>F: 74<br>P: .002*    | NA                                                  | NA                     |
|                                                              | <b>Pain</b>      | Pr: $\approx$ 50<br>F: $\approx$ 70<br>P: <.001* |                                                              |                                     | Pr: 59<br>F: 67<br>P: .270     |                                                     |                        |
|                                                              | <b>ADL</b>       | Pr: $\approx$ 61<br>F: $\approx$ 82<br>P: <.001* |                                                              |                                     | Pr: 57<br>F: 67<br>P: .200     |                                                     |                        |
|                                                              | <b>Sport</b>     | Pr: $\approx$ 23<br>F: $\approx$ 51<br>P: <.001* |                                                              |                                     | Pr: 32<br>F: 46<br>P: .037*    |                                                     |                        |
|                                                              | <b>QOL</b>       | Pr: $\approx$ 21<br>F: $\approx$ 51<br>P: <.001* |                                                              |                                     | Pr: 29<br>F: 39<br>P: .062     |                                                     |                        |
|                                                              |                  |                                                  |                                                              |                                     |                                |                                                     |                        |
| <b>WOMAC</b>                                                 | <b>Overall</b>   | Pr: $\approx$ 38<br>F: $\approx$ 15<br>P: <.001* | NA                                                           | NA                                  | NA                             | NA                                                  | NA                     |
|                                                              | <b>Pain</b>      | Pr: $\approx$ 8<br>F: $\approx$ 4<br>P: <.001*   |                                                              |                                     |                                |                                                     |                        |
|                                                              | <b>Stiffness</b> | Pr: $\approx$ 3<br>F: $\approx$ 2<br>P: <.002*   |                                                              |                                     |                                |                                                     |                        |
|                                                              | <b>Function</b>  | Pr: $\approx$ 25<br>F: $\approx$ 11<br>P: <.001* |                                                              |                                     |                                |                                                     |                        |
| <b>SF-12</b>                                                 | <b>Physical</b>  | Pr: $\approx$ 33<br>F: $\approx$ 41<br>P: <.001  | NA                                                           | NA                                  | Pr: 42<br>F: 52<br>P: .112     | NA                                                  | NA                     |
|                                                              | <b>Mental</b>    | Pr: $\approx$ 53<br>F: $\approx$ 53<br>P: .910   |                                                              |                                     | Pr: 40<br>F: 43<br>P: .370     |                                                     |                        |
| <b>VAS</b>                                                   |                  | NA                                               | NA                                                           | Pr: 5.6<br>F: 1.2                   | NA                             | Pr: 6.7 $\pm$ 2<br>F: 0.9 $\pm$ 1.3                 | NA                     |
| <b>Self-assessment<br/>function scale<br/>10-point scale</b> |                  | NA                                               | NA                                                           | NA                                  | NA                             | Pr: 3.4 $\pm$ 1.9<br>F: 8.4 $\pm$ 1.5<br>P: <.01    | NA                     |
| <b>Satisfaction at<br/>Final FU, %<br/>(details)</b>         |                  | 81%<br>(Es: 50%;<br>S: 31.6%)                    | 95%<br>(Es: 78%; S: 17%;<br>Ss: 3%; Sd: 1%;<br>D: 1%)        | NA                                  | 63%                            | 92%                                                 | NA                     |

Abbreviations: Pr, Preop. value; F, Final FU value; P, P-value; 18-point, modified Merle d'Aubigné-Postel scale; IKDC, International Knee Documentation mittee; KS-F, knee Society Score function; KS-K, Knee Society Score Knee; KOOS, Knee Injury and Osteoarthritis Outcome Score; QOL, quality of life; ADL, ities of daily living; WOMAC, Western Ontario and McMaster Universities Osteoarthritis Index; HSS, modified Hospital for Special Surgery; SF-12, 12-Item t Form Survey; VAS, Visual Activity Score; Es, Extremely satisfied; S, Satisfied; Ss, Somewhat satisfied; Sd, Somewhat dissatisfied; D, Dissatisfied; NA, not able.

\*Statistically significant.
