# Supplementary material for: Fresh Osteochondral Allograft Transplantation in Osteochondritis Dissecans in the Knee Joint
Source: MDPI journal article supplement (doi:10.3390/life11111205), 2021-11-08
Supplement: s1 [file s1]

**Table S1.** Fresh osteochondral allograft transplantation in the treatment of osteochondritis dissecans (extended version).

| Year | Authors [reference]         | Patient, n° (OCA, n°) | Study design (Level of Evidence) | Knee site (%)                                                | Age, y: mean ± SD (range) | FU, y: mean ± SD (range) | Lesion Size, cm²: mean ± SD (range) | FOCA storage time and conditions                                               | FOCA type, n°; Mean size, cm²: mean ± SD (range)      | FOCA Fixation technique, n°                     | Prior Surgery, n° (%) / Procedures per Patient, n° (Mean);                                                                                                                       | Concomitant procedures    | Definition of Failure                                                                         | Failure at last FU, n° (%)                             | Estimated graft survival rate            | Re-operation rate*                         | Mean time to failure, y Mean ± SD |
|------|-----------------------------|-----------------------|----------------------------------|--------------------------------------------------------------|---------------------------|--------------------------|-------------------------------------|--------------------------------------------------------------------------------|-------------------------------------------------------|-------------------------------------------------|----------------------------------------------------------------------------------------------------------------------------------------------------------------------------------|---------------------------|-----------------------------------------------------------------------------------------------|--------------------------------------------------------|------------------------------------------|--------------------------------------------|-----------------------------------|
| 2018 | Cotter et al. [39]          | 37 (43)               | Case series (IV)                 | LFC 44%<br>MFC 51%<br>Both condyles 4%                       | 26 ± 9.96 (15-49)         | 7.29 ± 3.3               | 4.6 ± 1.7                           | Grafts preserved at 4°C                                                        | Dowel, 41<br>Snowman, 2                               | Most common press-fit                           | OCD ORIF, 17 (43.5%)<br>LBR, 13 (32.5%)<br>Microfracture and/or drilling, 21 (52.5%)<br>ACI, 1 (2.5%)<br>OATS, 1 (2.5%)                                                          | 11: 6 MAT, 3 HTO, 4 DFO   | OCA Revision, gross appearance of graft failure on second-look arthroscopy, knee arthroplasty | 2 (5.1%)                                               | 97% at 5 years                           | 35.9%                                      | 6.2 ± 3.8                         |
| 2016 | Sadr et al. [2]             | 135 (149)             | Case series (IV)                 | MFC 62%<br>LFC 29%<br>Trochlea 6%<br>Patella 1%<br>Others 2% | Median. 21 (12-55)        | Median: 6.3 (1.9-16.8)   | 7.3 (2.2-25)                        | Grafts preserved at 4°C. Transplantation between 7 and 28 days from harvesting | Dowel, 127<br>Shell, 19<br>Dowel and Shell, 3         | Press-fit or absorbable fixation                | Chondral debridement (67%)<br>LBR (51%)<br>SMS (42%)<br>ORIF (10%)<br>Osteotomy (3%)<br>Hardware removal (3%)<br>OAT (3%)<br>Previous OCA (2%)<br>Extensor mechanism repair (1%) | NA                        | OCA revision, knee arthroplasty                                                               | 12 (8%); 7 OCA revision, 3 UKA, 2 TKA                  | 95% at 5 years<br>93% at 10 years        | 23%                                        | 6.1 ± 4.5                         |
| 2012 | Lyon et al. [40]            | 11 (12)               | Case series (IV)                 | MFC 31%<br>LFC 54%<br>Patella 7.5%<br>Trochlea 7.5%          | 15.2 (13-20.4)            | 2 (1-3.4)                | 5.1 (1.8-8)                         | Transplantation between 14 and 21 days from harvesting                         | Dowel, 8<br>Shell, 4<br><br>Mean size 5.1 cm² (1.8-8) | Press-fit, 8<br>Metal or absorbable fixation, 4 | 0                                                                                                                                                                                | 0                         | X-ray at 2 years not showing full graft incorporation                                         | 0%                                                     | 100% at last FU                          | 0%                                         | NA                                |
| 2009 | Pasqual-Garrido et al. [41] | 46 (16)               | Case series (IV)                 | NA                                                           | 34 ± 9.5 (20-49)**        | 4.0 ± 1.8 (2.0-10.6)**   | 4.5 ± 2.7 (0.9-15)**                | NA                                                                             | Dowel<br><br>Mean size 2.4 ± 0.9 cm²**                | NA                                              | 0                                                                                                                                                                                | 17: 5 HTO, 2 MAT, 10 MF** | Clinical failure and subsequent surgeries                                                     | 1/16 OCA (6%); TKA                                     | 94% at last FU**                         | NA                                         | 14 months                         |
| 2007 | Emmerson et al. [42]        | 64 (66)               | Case series (IV)                 | MFC 62%<br>LFC 38%                                           | 28.6 (15-54)              | 7.7 (2-22)               | 7.5                                 | Grafts preserved at 4°C. Transplantation between 5 and 28 days from harvesting | Dowel and Shell<br><br>Mean size 7.5 cm²              | Press-fit or absorbable fixation                | 1.7 procedures per patient - most commonly LBR                                                                                                                                   | 1 ACLR                    | OCA revision or removal, UKA or TKA                                                           | 9 (13%); 6 OCA revision, 1 OCA removal, 1TKA, 1 UKA    | 91% at 5 years<br>76% at 10 and 15 years | 10 (15%)                                   | 4.9 ± 2.4                         |
| 1994 | Garrett et al. [43]         | 17 (17)               | Case series (IV)                 | LFC 100%                                                     | 20 (16-46)                | 3.5 (2-9)                | NA                                  | Grafts preserved at 4°C. Transplantation within 4 days                         | Dowel, 10<br>Shell, 7<br><br>Size: 2 to 6 cm²         | Fixation with Herbert screws                    | Abrasion arthroplasty, 14 (82.5%)                                                                                                                                                | NA                        | X-ray not showing full graft incorporation or clinical failure                                | 1 (6%); not specified different reconstructive surgery | 94% at last FU                           | 17 (100%): 1 failure + 16 hardware removal | 15 months                         |

Abbreviations: OCD: osteochondritis dissecans; OCA: osteochondral allograft transplantation; MFC: medial femoral condyle; LFC: lateral femoral condyle; HTO: high tibial osteotomy; TKA: total knee arthroplasty; UKA: unilateral knee arthroplasty; SMS: subchondral marrow stimulation; LBR: loose body removal; OAT: osteochondral autograft transplantation; ACI: autologous chondrocyte implantation. ORIF: open reduction and internal fixation; FU: follow-up; NA: not available.

\*Re-operation rate = failures + operations not related to the graft

\*\*On total study cohort
